# Supplementary material for: Long-Range Chromatin Interactions Drive Mutant TERT Promoter Activation
Source: Oxford University Press journal article supplement (doi:10.1158/2159-8290.cd-16-0177), 2016-09-20
Supplement: 21598290cd160177-sup-162146_2_supp_3660141_md7wmk.xlsx [file 21598290cd160177-sup-162146_2_supp_3660141_md7wmk.xlsx]

## Sheet: Sup.Table1
Sup. Table 1: Differential gene expression data list of BLM6 and BLM14 cells (-146C>T vs. -146C) for the genes that were predicted to be off-targets of the guide RNA
that has been used for the CRISPR/Cas9 genome engineering.
gene	locus	BLM6-FPKM	BLM14-FPKM	Log2 (fold change)	p_value	q_value	significant
WBP2	chr17:73841779-73852588	7.4021	7.71124	0.0590289	0.7089	0.999667	no
SBF1	chr22:50781732-50913454	12.3809	14.023	0.179679	0.40525	0.999667	no
FCGR2A	chr1:161475219-161648444	0.0393571	0.285296	2.85776	1	1	no
FCGR2C	chr1:161475219-161648444	0	0	0	1	1	no
FCGR2B	chr1:161475219-161648444	0.00596951	0.00444566	-0.425214	1	1	no
MYO18A	chr17:27400527-27507430	8.9232	7.41369	-0.267369	0.36545	0.999667	no
POU2F2	chr19:42590262-42700737	3.09935	3.74331	0.272349	0.49565	0.999667	no
WTAP	chr6:160090088-160210781	25.2929	26.7378	0.0801487	0.83335	0.999667	no
DUOX2	chr15:45384847-45493373	0	0	0	1	1	no
DUOX1	chr15:45384847-45493373	0.211038	0.0419116	-2.33208	1	1	no
AHDC1	chr1:27860545-27930942	1.20061	1.43486	0.257137	0.45065	0.999667	no
PLEC	chr8:144989320-145050902	18.2921	18.7218	0.0335001	0.88485	0.999667	no
FAM57B	chr16:30034654-30064299	0.107559	0.117622	0.129027	1	1	no
SHARPIN	chr8:145153535-145173218	16.727	17.7071	0.0821544	0.82655	0.999667	no
ESPNL	chr2:239008797-239041928	0.00767392	0.147685	4.26642	1	1	no
LCN10	chr9:139632618-139642980	0	0.0571339	0	1	1	no
FAM19A3	chr1:113263040-113269857	0.0121613	0.0359796	1.56488	1	1	no
SCARB1	chr12:125261401-125367214	20.2853	16.847	-0.267941	0.0875	0.999667	no
KY	chr3:134316642-134979309	0.00294666	0.00259632	-0.182608	1	1	no
PYGM	chr11:64513860-64527769	0.0308844	0.0292377	-0.0790514	1	1	no
G6PD	chrX:153759605-153796782	25.8211	26.345	0.0289772	0.8823	0.999667	no
RHNO1	chr12:2904118-3050306	41.4824	39.3013	-0.0779214	0.8672	0.999667	no
ZBTB17	chr1:16268363-16302627	18.3832	18.3045	-0.0061891	0.96395	0.999667	no
MED16	chr19:867961-893218	9.10092	10.1968	0.164038	0.2084	0.999667	no
MEGF6	chr1:3406483-3528059	0.415469	0.370706	-0.164463	1	1	no
PANK2	chr20:3868885-3907605	18.4237	17.6318	-0.0633877	0.7201	0.999667	no
DUT	chr15:48604549-48635570	87.9221	82.3568	-0.0943388	0.57145	0.999667	no
LENG8	chr19:54955990-54974894	5.2839	6.54188	0.308103	0.27745	0.999667	no
WAC	chr10:28811580-28912041	45.2323	48.0373	0.0868007	0.664	0.999667	no
TYSND1	chr10:71897736-71906432	13.7052	13.0883	-0.0664494	0.6589	0.999667	no

## Sheet: Sup. Table2
Sup. Table 2: Table showing list of interacting regions obtained from 4C analysis. 4C was performed in BLM6 and BLM14 cells. Differential interactions were obtained from 4C analysis. List shows the genomic coordinates (column 1-3) and their Refseq identities (column 4) of regions interacting with mutant Tert promoter. Column 5 shows whether the regions were tested by 3C-qPCR assay. Y = Yes, N=No.…
Chromosome	Start	End	Refseq	3C tested Yes/No	Removed by CRISPR/Cas9
*chr5	1556087	1558758	.	Y	Y
chr5	1185869	1188471	.	Y	N
chr5	1418006	1425424	SLC6A3_protein_coding	Y	N
chr5	1464213	1467357	LPCAT1_protein_coding	Y	N
chr5	931169	933802	.	Y	N
chr5	1228017	1239710	SLC6A18_protein_coding	Y	N
chr5	1310213	1315609	.	Y	N
chr5	1318798	1330607	CLPTM1L_protein_coding	Y	N
chr5	1402498	1403931	SLC6A3_protein_coding	Y	N
chr5	1403936	1410330	SLC6A3_protein_coding	Y	N
chr5	1457736	1464208	LPCAT1_protein_coding	Y	N
chr5	1759133	1762849	.	Y	N
chr5	1170232	1185864	CTD-3080P12.3_AS	N	N
chr5	1217944	1221205	SLC6A19_protein_coding	N	N
chr5	1221210	1223541	SLC6A19_protein_coding	N	N
chr5	1223546	1228012	SLC6A18_protein_coding	N	N
chr5	1303210	1310208	MIR4457_miRNA	N	N
chr5	1315614	1317767	.	N	N
chr5	1318030	1318793	CLPTM1L_protein_coding	N	N
chr5	1392795	1402493	SLC6A3_protein_coding	N	N

## Sheet: Sup.Table3
Sup. Table 3: Primer sequences for ChIP-qPCR, 4C and 3C and RT-qPCR experiments.
Chip-qpcr	Endo hTERT promoter_fw	GCGGCGCGAGTTTCAG
Chip-qpcr	Endo hTERT promoter_rv	AGCACCTCGCGGTAGTGG
Chip-qpcr	Up1kb_TERT_promoter_fw	GTTTCTCGCCCCTTAGATCC
Chip-qpcr	Up1kb_TERT_promoter_rv	GCAGGACAGCTGAGGACTTC
Chip-qpcr	Up2.5kb_TERT_promoter_fw	AAACTTCCCTGGGCTCAAGT
Chip-qpcr	Up2.5kb_TERT_promoter_rv	CGGTGTATCCCCAGTCTACG
Chip-qpcr	Up5kb_TERT_promoter_fw	CCAAAGGCGTAAAACAGGAA
Chip-qpcr	Up5kb_TERT_promoter_rv	CCTCGTGTACTTTCCCTTGC
Chip-qpcr	Down1kb_TERT_promoter_fw	GACCGAGTGACCGTGGTTT
Chip-qpcr	Down1kb_TERT_promoter_rv	AGAGAGCGCACCCTCCAA
Chip-qpcr	Up800bp_TERT_promoter_fw	CTCCATTTCCCACCCTTTCT
Chip-qpcr	Up 800bp_TERT_promoter_rv	ACTTGGGCTCCTTGACACAG
Chip-qpcr	Gabpa_promoter_fw	CCAGAACTGGAGTCCCAAAA
Chip-qpcr	Gabpa_promoter_rv	GAAGTAGAGCGGAGGTGGTG
Chip-qpcr	chr5:1,556,087-1,558,758_fw (293.bp)	TTGCTCTGTGCTCCATGAAC
Chip-qpcr	chr5:1,556,087-1,558,758_rv (447.bp)	TACACAGCCTCCTCAACTCG
4C-seq	Tert_HindIII site	TCTCTTGCCCTCGCGGTTTC
4C-seq	Tert_DpnII site	TCCCTTGAGAAGGGTGCTTCC
3C-qpcr	Tert_HindIII	TCCCTTGAGAAGGGTGCTTCC
3C-qpcr	chr5_931,169	CTGTTTGCTCACATGGGTGT
3C-qpcr	chr5_1,185,869	TCCACAGAGTGTGTCAGATGG
3C-qpcr	chr5_1,556,087	GATGATAAGGGAGGCTGTGG
3C-qpcr	chr5_1,464,213	ACTTGGTCTTGTCCCTGAGC
3C-qpcr	chr5_1,418,006	CTCACAGCAGCCCTCTCAC
RT-qPCR	Tert forward (exon3)	CCAAGTTCCTGCACTGGCTGA
RT-qPCR	Tert reverse (exon4)	TTCCCGATGCTGCCTGAC
RT-qPCR	GABPA forward	GGACGGGTCTAGGTGAGACA
RT-qPCR	GABPA reverse	TGGCTGGAGTATTTCAAAGGAT
RT-qPCR	BRD4 forward	CTCGGACAGTGACAGTTCGAC
RT-qPCR	BRD4 reverse	TCCTTCTTGCTCACATTGCTG
RT-qPCR	Tert alpha+	TGTACTTTGTCAAGGTGGATGTG
RT-qPCR	Tert alpha-	CTGAGCTGTACTTTGTCAAGGAC
RT-qPCR	Tert beta+	GTACGGCTGGAGGTCTGTCAA
RT-qPCR	Tert beta-	GGCACTGGACGTAGGACGTGG
